# Supplementary material for: Atomic structure of defects and interfaces in TiO2-B and Ca:TiO2-B (CaTi5O11) films grown on SrTiO3
Source: Royal Society of Chemistry journal article supplement (doi:10.1039/c5ce00493d), 2015-01-01
Supplement: c5ce00493d1.pdf [file c5ce00493d1.pdf]

## ***Supporting Information for***

### **Atomic structure of defects and interfaces in TiO<sub>2</sub>-B and Ca:TiO<sub>2</sub>-B (CaTi<sub>5</sub>O<sub>11</sub>) films grown on SrTiO<sub>3</sub>**

Sung Joo Kim,<sup>a</sup> Kui Zhang,<sup>a</sup> Michael B. Katz,<sup>a</sup> Baihai Li,<sup>a</sup> George W. Graham,<sup>a</sup> and Xiaoqing Pan<sup>\*b</sup>

*<sup>a</sup>Department of Materials Science and Engineering, University of Michigan, 2300 Hayward Street, Ann Arbor, MI 48109, USA*

*<sup>b</sup>Department of Chemical Engineering and Materials Science and Department of Physics and Astronomy, University of California - Irvine, 816 F Engineering Tower, Irvine, CA 92697, USA  
E-mail: xiaoqing.pan@uci.edu*

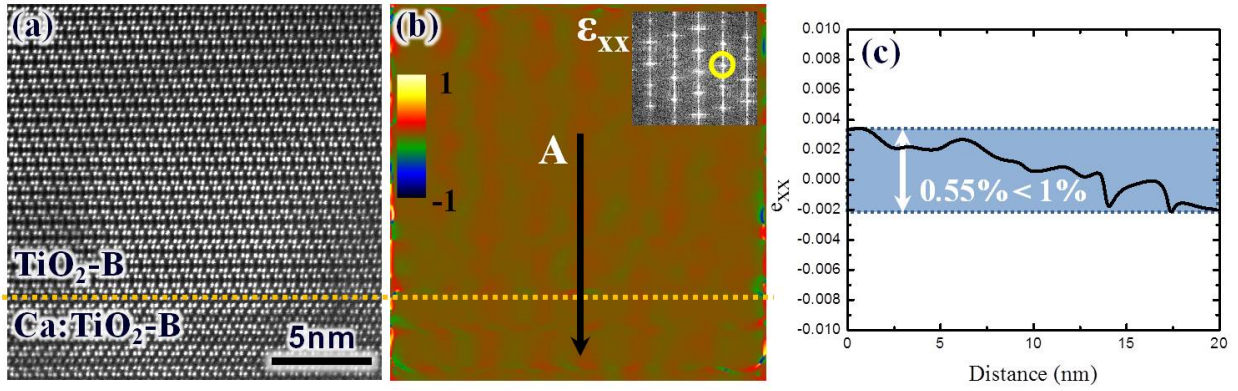

**Fig. s1** Misfit strain analysis of  $\text{TiO}_2\text{-B}$  and  $\text{Ca:TiO}_2\text{-B}$  using geometric phase analysis. (a) An actual HR-STEM image, (b) a strain ( $\epsilon_{xx}$ ) map of an image, and (c) a strain profile from the line-scan A.

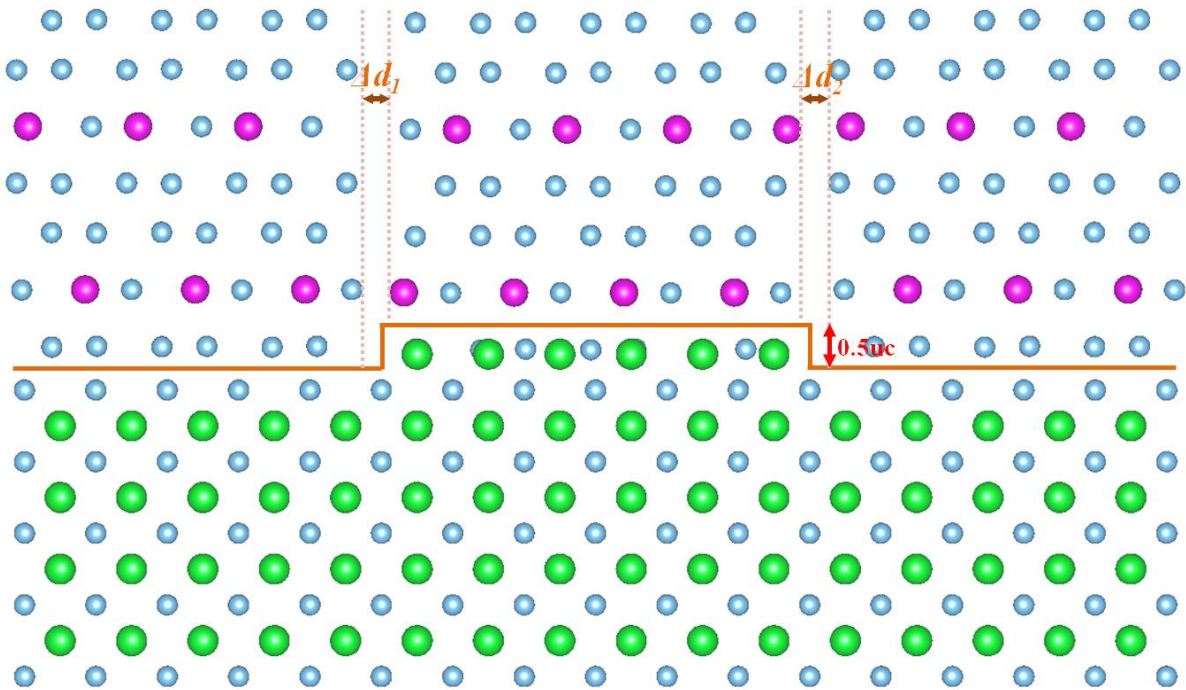

**Fig. s2** (a) Schematic illustration of a surface step terrace (= 0.5 unit cell (u.c.)), or SST, at the interface between STO and Ca:TiO<sub>2</sub>-B. Unit cells of Ca:TiO<sub>2</sub>-B cannot fulfill epitaxy everywhere along the surface where there are gaps (equivalent of  $\Delta d_1$  and  $\Delta d_2$  in the diagram) due to the step. However, during growth, each gap is filled with another vertical row of atoms.

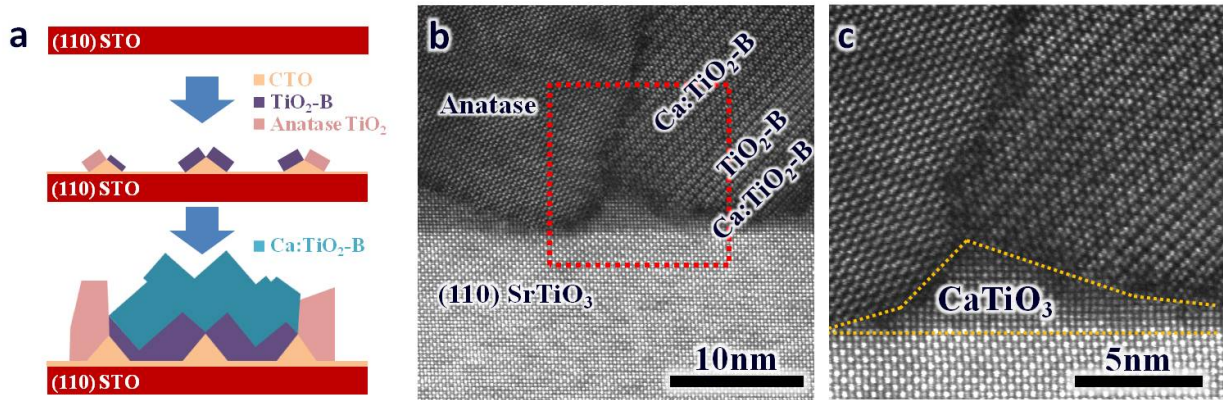

**Fig. s3** (a) Schematic of sequential growth of TiO<sub>2</sub>-B + Ca:TiO<sub>2</sub>-B mixture phase and another titania polymorph, anatase, grown on (110) STO, (b) high-resolution STEM images showing the presence of CaTiO<sub>3</sub> layer for tilted growth of the mixture phase. (c) an interphase boundary formed between anatase and TiO<sub>2</sub>-B grains.

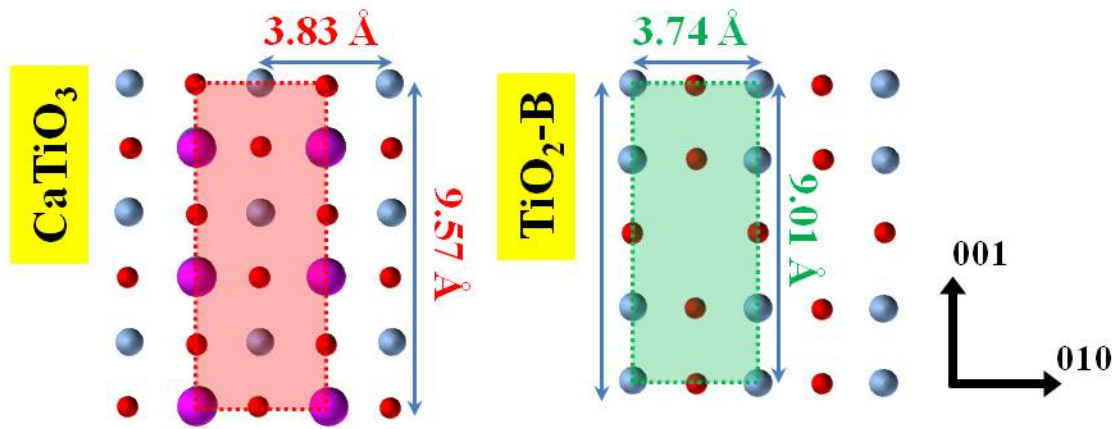

**Fig. s4** Comparison of atomic configuration between (100) planes of  $\text{CaTiO}_3$  and  $\text{TiO}_2\text{-B}$ .

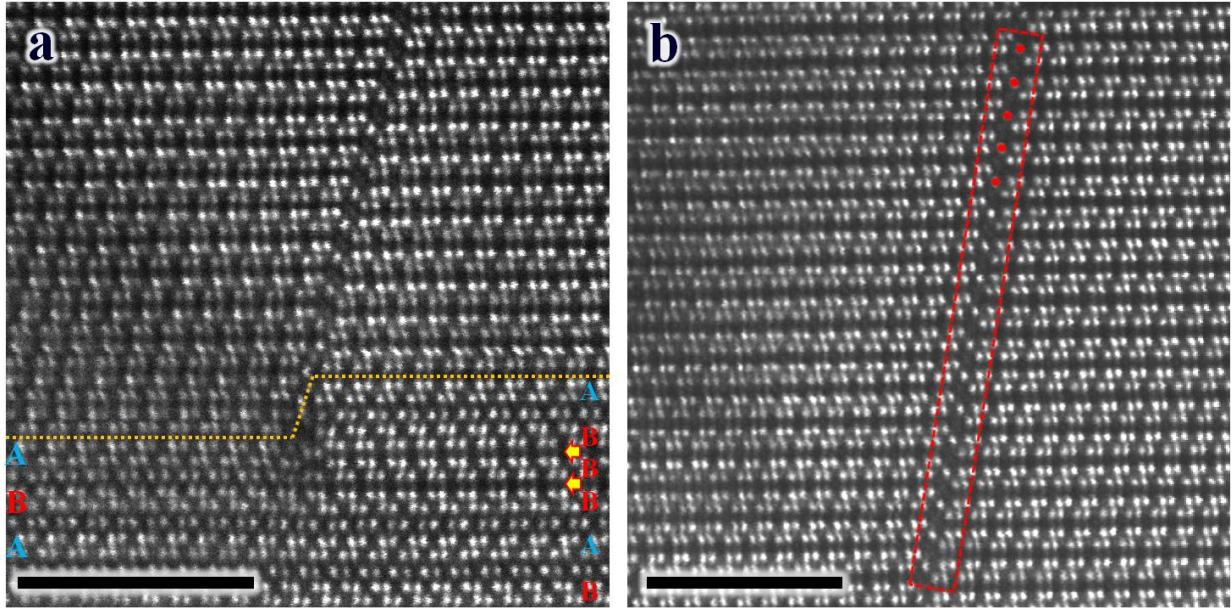

**Fig. s5** (a) High-resolution STEM images of defects at the interface between  $\text{TiO}_2\text{-B}$  and  $\text{Ca}:\text{TiO}_2\text{-B}$  with two missing Ca-modified layers that generate the two adjacent  $\text{TiO}_2\text{-B}$  grains oriented same direction. (b) This generates the long-range boundary condition throughout the boundary with possible occupancy sites for Ti atoms from either left or right-side  $\text{TiO}_2\text{-B}$  grain.
